# Supplementary material for: Using Natural Gradients to Infer a Potential Response to Climate Change: An Example on the Reproductive Performance of Dactylis Glomerata L
Source: Biology (Basel). 2012 Dec 13;1(3):857–68. doi: 10.3390/biology1030857 (PMC4009817; doi:10.3390/biology1030857)

**Figure S1.** Scatterplots of elevation *versus*: (a) environmental energy variables, (b) water availability and (c) climatic seasonality. Solid and dashed lines show the results of linear regression. Solid lines represent slopes that are significantly different from zero at  $\alpha = 0.05$ .

**(a) Environmental energy**

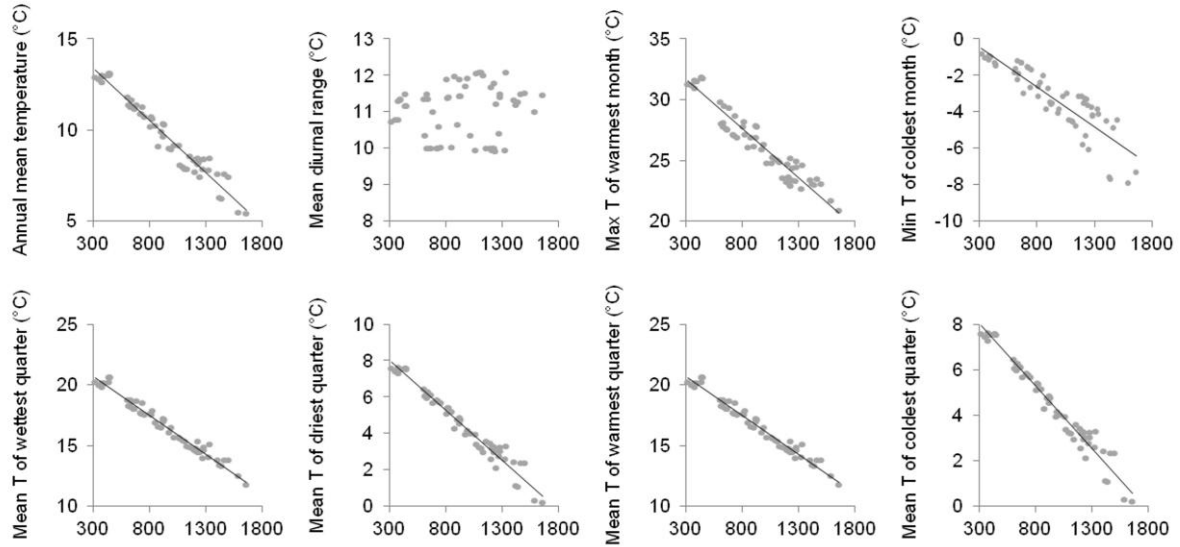

**(b) Water availability**

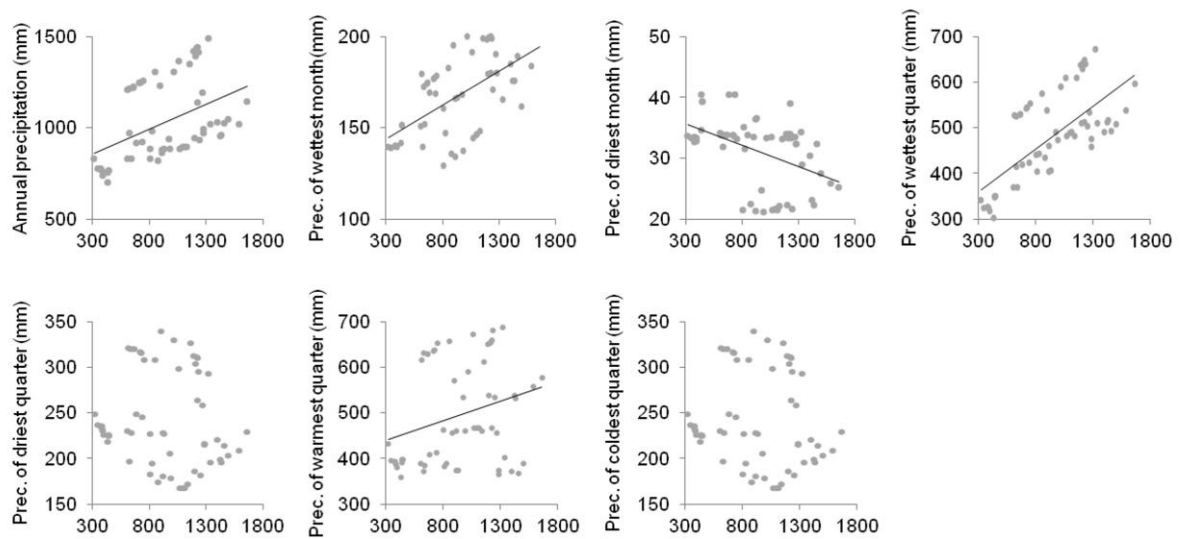

**(c) Climatic seasonality**

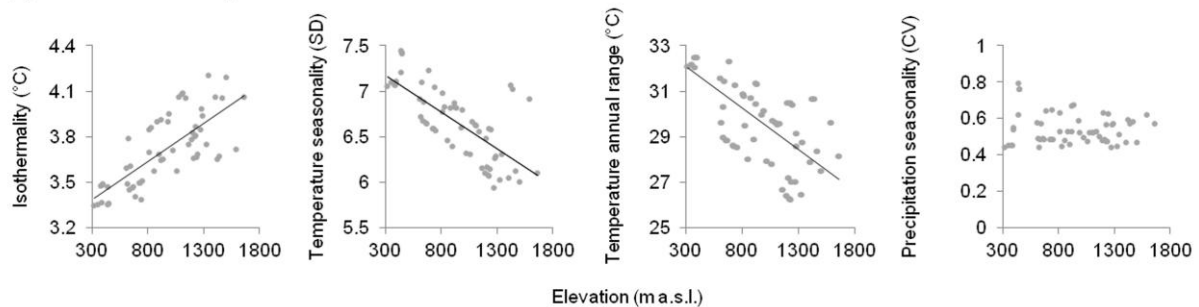

**Figure S2.** Distribution of (●) the *Dactylis glomerata* populations ( $n = 60$ ) sampled and (▲) the meteorological stations ( $n = 31$ ) in the eastern province of Trento (NE Italy).

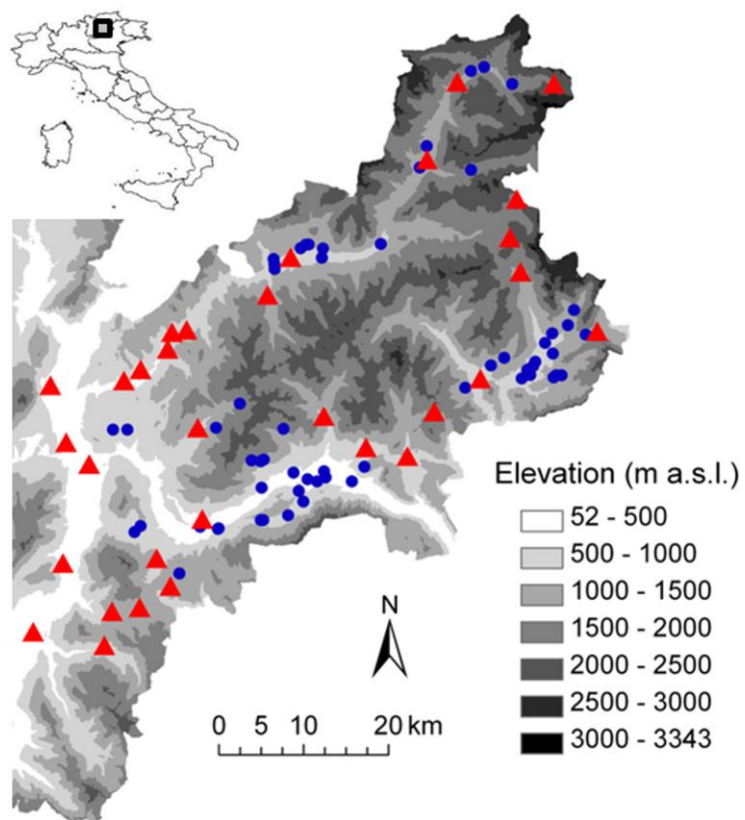

Supplement: Supplementary File 1 — Supplementary Information (PDF, 250 KB) [file biology-01-00857-s001.pdf]
